1    Ultrasensitive capture of human herpes simplex virus genomes directly from clinical  
2    samples reveals extraordinarily limited evolution in cell culture

3

4    Alexander L. Greninger<sup>a,b,#</sup>, Pavitra Roychoudhury<sup>a,b</sup>, Hong Xie<sup>a</sup>, Amanda Casto<sup>c</sup>, Anne  
5    Cent<sup>a,b</sup>, Gregory Pepper<sup>a,b</sup>, David M. Koelle<sup>a,b,c,d,e</sup>, Meei-Li Huang<sup>a,b</sup>, Anna Wald<sup>a,b,c,f</sup>,  
6    Christine Johnston<sup>b,c</sup>, Keith R. Jerome<sup>a,b</sup>

7

8    <sup>a</sup>Department of Laboratory Medicine, University of Washington, Seattle, WA, USA

9    <sup>b</sup>Fred Hutchinson Cancer Research Institute, Seattle, WA, USA

10   <sup>c</sup>Department of Medicine, University of Washington, Seattle, WA, USA

11   <sup>d</sup>Department of Global Health, University of Washington, Seattle, WA, USA

12   <sup>e</sup>Benaroya Research Institute, Seattle, WA, USA

13   <sup>f</sup>Department of Epidemiology, University of Washington, Seattle, WA, USA

14

15   Running title: HSV primary sample versus culture sequencing

16

17   <sup>#</sup>Address correspondence to Alexander L. Greninger, [agrening@uw.edu](mailto:agrening@uw.edu)

18

19

20   Abstract word count: 251

21   Article word count: 4184

22

23

24 **Abstract**

25 Herpes simplex viruses (HSV) are difficult to sequence due to their large DNA genome,  
26 high GC content, and the presence of repeats. To date, most HSV genomes have been  
27 recovered from culture isolates, raising concern that these genomes may not accurately  
28 represent circulating clinical strains. We report the development and validation of a DNA  
29 oligonucleotide hybridization panel to recover near complete HSV genomes at  
30 abundances up to 50,000-fold lower than previously reported. Using copy number  
31 information on herpesvirus and host DNA background via quantitative PCR, we  
32 developed a protocol for pooling for cost-effective recovery of more than 50 HSV-1 or  
33 HSV-2 genomes per MiSeq run. We demonstrate the ability to recover >99% of the HSV  
34 genome at >100X coverage in 72 hours at viral loads that allow whole genome recovery  
35 from latently-infected ganglia. We also report a new computational pipeline for rapid  
36 HSV genome assembly and annotation. Using the above tools and a series of 17 HSV-  
37 1-positive clinical swabs sent to our laboratory for viral isolation, we show limited  
38 evolution of HSV-1 during viral isolation in human fibroblast cells compared to the  
39 original clinical samples. Our data indicate that previous studies using low passage  
40 clinical isolates of herpes simplex viruses are reflective of the viral sequences present in  
41 the lesion and thus can be used in phylogenetic analyses. We also detect superinfection  
42 within a single sample with unrelated HSV-1 strains recovered from separate oral lesions  
43 in an immunosuppressed patient during a 2.5-week period, illustrating the power of  
44 direct-from-specimen sequencing of HSV.

45

46 **Importance**

47 Herpes simplex viruses affect more than 4 billion people across the globe, constituting a  
48 large burden of disease. Understanding global diversity of herpes simplex viruses is  
49 important for diagnostics and therapeutics as well as cure research and tracking

50 transmission among humans. To date, most HSV genomics has been performed on  
51 culture isolates and DNA swabs with high quantities of virus. We describe the  
52 development of wet-lab and computational tools that enable the accurate sequencing of  
53 near-complete genomes of HSV-1 and HSV-2 directly from clinical specimens at  
54 abundances >50,000-fold lower than previously sequenced and at significantly reduced  
55 cost. We use these tools to profile circulating HSV-1 strains in the community and  
56 illustrate limited changes to the viral genome during the viral isolation process. These  
57 techniques enable cost-effective, rapid sequencing of HSV-1 and HSV-2 genomes that  
58 will help enable improved detection, surveillance, and control of this human pathogen.  
59

## 60 **Introduction**

61 Herpes simplex virus-1 (HSV-1) and herpes simplex virus-2 (HSV-2) are  
62 alphaherpesviruses causing over 4 billion human infections that can manifest as oral and  
63 genital ulcerations, neonatal disease, herpetic keratitis, and encephalitis (1, 2). While  
64 HSV-2 has traditionally been associated with genital herpes, HSV-1 comprises the  
65 majority of first episode genital herpes infections in high income countries (3). HSV  
66 genome evolution is notable for extensive HSV-1 recombination within HSV-2 genomes,  
67 with no detectable HSV-2 recombination into HSV-1 genomes (4, 5).

68 To date, most human herpes simplex virus genome sequencing has been  
69 performed on culture isolates (6–10). Culture is a pragmatic method to enrich for viral  
70 sequences and many clinical virology labs have rich banks of cultured HSV isolates.  
71 However, without the ability to compare these sequences to sequence recovered directly  
72 from clinical samples, interpretation of sequence results has been tempered by the  
73 concern that culture isolates might not accurately represent viral sequence *in vivo*.  
74 Other viruses such as influenza and parainfluenza viruses have shown that culture  
75 adaptation results in radically different viral sequence and receptor binding properties  
76 that do not accurately reflect selection pressures *in vivo* (11–13). Culture of the  
77 polyomaviruses BK and JC viruses is often performed in SV40 large T-antigen  
78 immortalized cell lines, allowing near complete loss of the BKV and JCV large T-antigen  
79 via transcomplementation, representing loss of one-third of the viral genome (14, 15).  
80 Culture adaptation of human herpesvirus 6A/B results in large tandem repeats in the  
81 origin of replication and other regions that are not found in low-passage clinical isolates  
82 and likely help accelerate viral replication *in vitro* (16–18). Similarly, laboratory passage  
83 of human cytomegalovirus, Epstein-Barr virus, and varicella-zoster virus can result in  
84 surprisingly large deletions comprising multiple genes and kilobases (19–22).

85 Many clinical studies of HSV conducted at our institution and throughout the  
86 world have utilized swabs to obtain DNA, which have the advantages of being easily  
87 collected, stable at room temperature, and can be sequenced directly from the patient.  
88 To fully take advantage of the rapidly growing field of genomics to understand HSV  
89 pathogenesis and diversity, we created a high-throughput method for sequencing HSV  
90 from DNA swab and culture material. Capture sequencing has become commonly used  
91 in human exome sequencing, oncology panels, and for other herpes viruses (23–25).  
92 We report here the development of wet-lab and dry-lab tools for sequencing of HSV-1  
93 and HSV-2 genomes directly from clinical specimens using a custom oligonucleotide  
94 hybridization panel. In our hands, these methods extended the range of HSV-1 and  
95 HSV-2 viral abundances from which whole genome recovery is possible by up to 5  
96 logarithms. By recovering HSV-1 sequence direct from clinical specimens, we compare  
97 sequences from HSV-1 in clinical samples with clinical isolates recovered from culture  
98 on human fibroblast cells. We show extraordinary limited evolution of HSV-1 genomes  
99 during viral isolation. As an example of the power of our approach, we also report the  
100 first genomic detection of HSV-1 superinfection from a single oral swab.

101

## 102 **Results**

### 103 *Development of standard operating procedure for HSV genome capture*

104 To recover whole genomes directly from clinical swabs, we designed a  
105 specialized capture sequencing workflow for clinical HSV genomics. DNA is extracted  
106 from clinical swabs collected in universal transport media or proteinase K buffer and total  
107 DNA is quantitated (Figure 1A). HSV and beta-globin copy number are quantitated  
108 using specific qPCR.

109 Based on our experience with the limited sensitivity of shotgun sequencing  
110 directly from HSV-2 clinical swabs, we developed a custom tiling oligonucleotide panel

111 for HSV-2 based on the HG52 reference genome (NC\_001798) (Figure 1B) (9).  
112 Experiments showed that while the HSV-2 capture panel could readily recover near  
113 complete genomes from HSV-2 material, it could only recover less than 30% of the HSV-  
114 1 genome from HSV-1 culture specimens (Figure S1A). Recovered regions of HSV-1  
115 correlated with its average pairwise identity to HSV-2, requiring >85% pairwise identity  
116 for high coverage (Figure S1B). We thus designed an additional HSV-1 capture panel  
117 for subsequent HSV-1 capture experiments (Figure 1B).

118 To increase the cost-effectiveness of capture sequencing, we developed a  
119 pooling scheme for performing capture on dual-indexed libraries. While pooling  
120 schemes are common in many capture sequencing protocols, dealing with potential  
121 billion-fold differences in copy number between different HSV specimens along with  
122 differences in host background and variance of quantitation by qPCR required a different  
123 approach (Figure 1C). For example, inclusion of a high HSV copy number specimen in  
124 the same pool with a low copy number specimen could result in few reads being  
125 obtained for the lower copy number specimen, thus requiring re-enrichment of the low  
126 copy number library. Our protocol ranks libraries by the relative amounts of HSV and  
127 beta-globin present and pools of 5-10 specimens are chosen based on the variance of  
128 HSV/human ratio present in the samples prepared. We generally prepare 30-50 pre-  
129 capture libraries in batch, resulting in approximately 4-7 pools for capture. Samples in  
130 pools may be subsequently reassigned to a different pool based on the total copy  
131 number of HSV-1 and HSV-2 present. Because different amounts of HSV are present in  
132 each pool, we perform the post-enrichment amplification step with an initial 10 cycles of  
133 PCR followed by monitoring of additional cycles on lower concentration pools by either  
134 SYBR-Green or iterative checking by agarose gel electrophoresis to a maximum of 20  
135 PCR cycles after capture. Pools are sequenced on 2x300 bp Illumina MiSeq runs to  
136 enhance recovery of particularly high GC regions and the multiple repeats present in

137 HSV genomes. The finished protocol as illustrated on culture specimens results in  
138 significant enrichment across the HSV-2 genome (Figure 1D).

139

#### 140 *Development of a custom pipeline for HSV assembly and annotation*

141 We developed a computational pipeline (Figure 2) to rapidly extract and annotate  
142 near-full length HSV genomes from raw Illumina sequencing reads. By employing a  
143 combination of reference-guided and assembly-based methods to construct consensus  
144 sequences, we were able to recover up to 99% of the genome.

145 The workflow starts with quality analysis of raw reads followed by trimming to  
146 remove adapters and low-quality regions. For samples sequenced without target capture  
147 enrichment or with a low percentage of HSV reads, a k-mer based filtering method is  
148 used to enrich for HSV reads based on similarity to the HSV-1 strain 17 and HSV-2  
149 strain HG52 and SD90e reference sequences (Figure 2). The removal of off-target reads  
150 significantly speeds up downstream processing steps by preventing *de novo* assembly  
151 of mammalian genomes. Preprocessed reads are *de novo* assembled into contigs and  
152 the reference sequence is used to order these contigs and fill in any gaps. Reads are  
153 then mapped to this resulting template and custom scripts are used to construct the final  
154 consensus sequence. Finally, the consensus sequence is annotated and prepared for  
155 Genbank deposit. Our pipeline combines several previously published open-source tools  
156 with custom scripts and can be run on desktop computers, servers and high-throughput  
157 computing clusters. On average, a single sample containing about 700,000 raw reads  
158 run on a machine with 14 cores takes about 15 minutes.

159

#### 160 *Accuracy of capture-based sequencing*

161 To validate the accuracy of our sequencing method, we compared thymidine  
162 kinase (UL23) sequences obtained from PCR-Sanger sequencing and those obtained

163 from our capture sequencing method for eight strains of HSV-1 and eight strains of HSV-  
164 2 (Figure S2). For Sanger sequencing, UL23 was PCR amplified from genomic DNA  
165 and Sanger sequenced to a minimum of 2X coverage. For the WGS genes, majority  
166 consensus sequence for the UL23 CDS was extracted from the annotated assembly and  
167 aligned against the corresponding Sanger sequence. No consensus variants were  
168 recovered from either of the two genes in either HSV-1 or HSV-2, yielding an accuracy  
169 of 100%.

170

### 171 *Limits of genome recovery*

172 To determine the lower limit of capture for our whole genome sequencing method  
173 and to understand the determinants of our on-target percentage and coverage statistics,  
174 we performed capture sequencing on HSV-1 and HSV-2 clinical samples across a range  
175 of concentrations (Figure 3, Table S1). We calculated the pre-capture ratio of HSV  
176 mass to human DNA mass based on the quantities of HSV and beta-globin recovered in  
177 the initial qPCR reaction. We then compared the pre-capture HSV mass ratio to the on-  
178 target fraction of HSV reads after the capture as a proxy for genome recovery.

179 We find on average 10,000X enrichment of viral sequences with our capture  
180 panels with a maximum of 100,000X (Figure 3). With this approach we have recovered  
181 whole genomes from HSV-1/2 samples with viral loads lower than  $10^2$  copies/rxn. Using  
182 an arbitrary cut-off of 5% on-target fraction of post-capture HSV reads, we can recover  
183 genomes from pre-capture ratios of  $10^{-7.40}$  for HSV-1 and  $10^{-5.78}$  for HSV-2,  
184 corresponding to approximately  $10^3$  copies/mL for HSV-1 and  $10^4$  copies/mL for HSV-2.  
185 Based on these copy numbers, we calculate that with capture sequencing we will be  
186 able to recover whole HSV genomes directly from nearly all swabs obtained by our  
187 clinical lab for symptomatic lesions and approximately 85% of HSV-positive swabs from  
188 asymptomatic persons for clinical studies (26).



189

190 *Sequencing of culture versus clinical specimens in HSV1*

191         With the ability to recover whole HSV genomes directly from clinical specimens,  
192 we sought to address to what extent does sequence obtained from HSV-1 isolates  
193 obtained during routine culture in our clinical virology lab reflect viral sequence present  
194 in clinical swabs? We obtained 17 pairs of original clinical HSV-1 swabs in universal  
195 transport media that had associated positive HSV-1 culture results on human fibroblast  
196 cells. These HSV-1 isolates were derived from a variety of specimens, including  
197 bronchoalveolar lavage, oral swabs, vaginal swabs, and penile swabs (Table S2). All  
198 HSV-1 isolates were in culture for fewer than 7 days (range of 2-7 days) and only one  
199 isolate (sample G9) was passaged after isolation.

200         We sequenced these samples to a median of 547,494 reads (IQR 352,038-  
201 830,777; n = 34) and we recovered near-full length consensus genomes from as low as  
202 101,000 reads. Median coverage was 518x (IQR 276-741x ; n = 34) with up to 99.6% of  
203 quality and adapter-trimmed reads being on-target for HSV-1 (median 99.2%, IQR 99.0-  
204 99.3, n = 34).

205         HSV-1 UL and US sequences recovered directly from clinical specimens were  
206 nearly identical to those recovered after isolation from human fibroblasts (Figure 4).  
207 Allowing for all mutations, UL-US culture pairs had on average 20 SNVs (range 2-59),  
208 and most of these were present in repetitive elements in genes US12 and US5 that likely  
209 represent sequencing/assembly artifacts. After accounting for missing data (N's),  
210 homopolymers (>8 nucleotides), and sequencing/assembly artifacts due to difficult loci  
211 such as high GC repeats in UL36, US5, and US12 genes, 14 of the 17 pairs of  
212 specimens were entirely identical in the UL-US region. One verified mutation was  
213 recovered in sample pair H5, with a synonymous C->T mutation in the consensus

214 sequence at nucleotide 603 in UL39. The original H5 sample had a 55% C, 45% T allele  
215 frequency at the locus, while the culture sample was 4% C, 96% T.

216 Sample G10 had four mutations between culture and clinical sample, including  
217 three synonymous changes in UL6, UL37, and UL54 and a T207A non-synonymous  
218 mutation in US7 coding sequence. All four mutations in G10 and the single mutation in  
219 H5 were confirmed by Sanger sequencing of the paired culture and original samples.  
220 The original sample for G10 had a notably low level of HSV-1 (18 copies/uL DNA or  
221 9,000 copies/mL) and its assembly was 9.1% missing data (N's). There was no  
222 evidence of HSV-2 recombination in the 17 pairs of HSV-1 sequences.

223

#### 224 *Detection of HSV-1 superinfection*

225 Samples pairs H4 and I5 were collected from the same patient in his 50s who  
226 underwent two allogeneic hematopoietic cell transplants for acute myelogenous  
227 leukemia. The first sample (H4, "day 1") was collected from a tongue ulcer and the  
228 second sample (I5, "day 18") was taken from an oral swab of a new tongue lesion 18  
229 days later. He started foscarnet induction therapy 4 days prior to the first sample for  
230 treatment of CMV reactivation, but was not treated with acyclovir in the intervening  
231 period. The day 1 oral swab measured  $10^{5.9}$  copies/mL for HSV-1 while the day 18 oral  
232 swab measured  $10^{5.4}$  copies/mL.

233 After removing SNVs associated with the UL36 gene, the consensus UL  
234 sequences recovered from the two original oral swabs differed by 207 nucleotides, which  
235 is consistent with previous estimates of average pairwise SNV differences between two  
236 unrelated HSV strains (6, 9). The consensus UL sequence from the day 1 original  
237 sample and culture specimen differed at only 3 nucleotides, which were all associated  
238 with homopolymers, consistent with the lack of evolution seen during culture isolation for  
239 thirteen other paired HSV-1 specimens. However, the consensus UL sequence from the

240 day 18 original sample and culture differed by 91 nucleotides, illustrating a rate of  
241 change significantly higher than seen in other paired specimens.

242 We hypothesized that changes in variant frequency between two different viral  
243 populations present in the day 18 specimen accounted for the increased rate of change  
244 during isolation in culture. Mapping of the day 18 original sample and cultured virus  
245 reads to the consensus day 1 original sample complete genome revealed 609 and 620  
246 single nucleotide variants with minor allele frequency > 5% and depth > 25X. Most (92%)  
247 of the matched variant alleles increased in frequency from the original swab to the  
248 culture genome, from a median 45% to 66% allele frequency between the two  
249 specimens (Figure 5). These data suggest the difference in consensus genome  
250 between the culture and original day 18 specimens were due to allele frequency  
251 changes across the 50% consensus threshold within a mixed infection.

252 Since the patient's HSV-1 emerged during foscarnet therapy, we next  
253 interrogated our sequence data for whether antiviral resistance was present in either of  
254 the oral swabs. Four non-synonymous mutations were present in the UL30 gene from  
255 the day 18 oral swab compared to the day 1 oral swab at varying allele frequencies  
256 (S724N, 6%; E798K, 11%; I810L, 16%; F918L, 57%). Compared to the HSV-1 17 strain  
257 reference genome (NC\_001806), both original samples had consensus UL30 coding  
258 changes at S33G, V905M, P920S, P1199Q, and T1208A. None of these changes has  
259 previously been reported to be associated with foscarnet resistance (27–29). These  
260 results are consistent with the patient being superinfected with two separate HSV-1  
261 strains that reactivated at separate times on the patient's tongue and were  
262 simultaneously detected from the day 18 specimen. These data also indicate that in the  
263 setting of superinfection, cultured samples may appear very different from swab samples  
264 due to differential abilities of the multiple viruses to grow in culture.

265

266 **Discussion**

267 We report the validation of capture sequencing panels for obtaining near  
268 complete HSV-1 and HSV-2 genomes directly from clinical samples. The panels allow  
269 the recovery of HSV-1 and HSV-2 genomes in approximately 3-5 days with as few as  
270 100,000 paired-end reads at viral concentrations that are up to 100,000-fold lower than  
271 previously reported for herpes simplex viruses. The level of enrichment seen here is  
272 similar to seen by others using capture panels (30, 31). We used this panel to show that  
273 HSV-1 undergoes extraordinarily limited evolution during culture isolation, finding only 5  
274 single nucleotide variant across more than 1.8 megabases of UL-US sequence from 15  
275 paired HSV-1 positive samples.

276 To date, direct-from-sample whole genome sequencing for herpes simplex  
277 viruses has been limited to samples with extraordinarily high viral copy numbers (9).  
278 The vast majority of genome sequence data available from herpes simplex viruses  
279 comes from culture isolates. Our data indicate that these culture isolate sequences  
280 likely faithfully represent the original herpes simplex virus sequence present in the  
281 clinical samples from which the viral isolate originated.

282 Despite the success of culture in faithfully amplifying genomes, capture  
283 sequencing direct from patient samples has a number of advantages. Clinical samples  
284 at low HSV copy number often do not yield positive cultures. Even high copy number  
285 culture samples may consist of less than 1% of HSV-1 reads, and thus captured libraries  
286 can be sequenced in greater depth and in a more multiplexed fashion. Capture  
287 sequencing of HSV for genotypic antiviral resistance for drugs such as acyclovir or  
288 foscarnet may also return results back faster than phenotypic culture-based tests, which  
289 require growth of the virus and have a relatively long turn-around time. Though this  
290 assay can be performed in as little as 72 hours, we envision that a capture-based whole-  
291 genome genotypic clinical test for antiviral resistance or epidemiological purposes would

292 likely be batched weekly with a sample-to-answer turn-around time of 5-11 days,  
293 pending when the sample is received and the required test volume. Engineering and  
294 automation improvements to the protocol could substantially reduce hands-on-time and  
295 lead to significantly faster turn-around times.

296 We also use direct from sample sequencing to show the first case of HSV-1  
297 superinfection detected directly from a patient by next-generation sequencing. The  
298 prevalence of HSV-1 infected individuals that carry more than one HSV-1 strain is not  
299 known, while HSV-2 superinfection is estimated to occur in approximately 3.5% of  
300 patients positive for HSV-2 (10). Despite HSV-1 reactivating in this patient in the setting  
301 of foscarnet treatment, no previously characterized mutations for foscarnet resistance  
302 were discovered (27, 29, 32). These data underscore the current challenge in  
303 confidently assigning antiviral resistance for HSV through genomic sequence.

304 Limitations of our study include examining HSV-1 evolution in the context of brief  
305 culture exposure with minimal passage. Our results may not be reflective for strains that  
306 undergo more passages than the initial viral isolation (“zero passage”) that was  
307 performed here. Notably, we and others have also not solved the problem of the high  
308 degree of homopolymers and repetitive sequence in the setting of high GC content in  
309 human herpes simplex viruses. Indeed, several of the loci cannot be confidently  
310 synthesized as oligonucleotides for the affinity purification panel. We also limited our  
311 sequence analysis to the UL and US regions of the genome.

312 In summary, we demonstrate the validation of a new robust, accurate, and  
313 sensitive tool to recover near complete HSV-1 and HSV-2 genome sequences, along  
314 with an easy pooling scheme to reduce overall sequencing costs. We show that HSV-1  
315 culture isolates undergo very few genomic changes in the UL-US region during isolation  
316 in culture. Indeed, culture may be the ultimate viral enrichment method for HSV-1 and  
317 HSV-2.

318

## 319 **Materials and Methods**

### 320 *Clinical Samples*

321 HSV-1 and HSV-2 samples were selected from natural history research studies  
322 at the University of Washington Virology Clinic that spanned a range of pre-capture viral  
323 concentrations (Table S1). Excess HSV-1 samples sent to the University of Washington  
324 Clinical Virology Lab for culture over a one-month period in 2017 were also selected for  
325 sequencing (Table S2). Informed consent was obtained for HSV-1 and HSV-2  
326 specimens from the Virology Clinic. Informed consent was waived for HSV-1 original  
327 swab and culture evolution samples by the University of Washington Human Subjects  
328 Division based on use of de-identified excess HSV-1 clinical specimens. The University  
329 of Washington Human Subjects Division approved both procedures.

330

### 331 *Swab DNA extraction and qPCR*

332 DNA was extracted from 200 µl of proteinase K buffer that the original swab specimen  
333 was placed in or from 40 µl of viral culture supernatants using QIAamp DNA Blood Mini  
334 kit (Qiagen). DNA was eluted into 100 µl of AE buffer provided in the extraction kit and  
335 10µl of the DNA was then used for each real-time PCR reaction. HSV DNA copy  
336 number was measured by a HSV type common real-time PCR assay which amplifies the  
337 gB gene (33). Human genomic number in the original swab samples was measure by  
338 the primers and probe design to detect beta-globin gene (betaF: TGA AGG CTC ATG  
339 GCA AGA AA; probe: TCC AGG TGA GCC AGG CCA TCA CT; betaR: GCT CAC TCA  
340 GTG TGG CAA AGG). Each 30 µl PCR reaction contained 10 µl of purified DNA, 833  
341 nM primers, 100 nM probe, internal control, 15 µl of QuantiTec multiplex 2x PCR master  
342 mix. The thermocycling conditions were as following: 50°C for 2 minutes, 95°C for 15  
343 minutes, and followed by 45 cycles of 94°C for 1 minute and 60°C for 1 minute.

344

345 *PCR/Sanger sequencing*

346 PCR reactions of HSV-1 and HSV-2 UL23 genes and discrepant loci were  
347 performed using the PrimeSTAR GXL DNA Polymerase (Takara) with the primer  
348 sequences available in Table S3A/B. Each 50 ul PCR reaction contained: 10 ul DNA, 10  
349 ul 5X PrimerSTAR GXL buffer, 0.2 mM dNTP, 0.32  $\mu$ M primers, and 1.25 units of  
350 PrimeSTAR GXL DNA Polymerase. PCR reactions were performed using the following  
351 conditions (98C 45s, [98C 10s, 60C 15s, 68C 120s] x 40 cycles, and 68C 10min).  
352 Confirmatory PCR for discrepant loci was performed using the following conditions (98C  
353 415s, [98C 10s, 55C 15s, 68C 30s] x 40 cycles, and 68C 5min). Sanger sequencing  
354 reactions were performed using the sequencing primers in Table S3C.

355

356 *Capture sequencing of HSV-1 and HSV-2 samples*

357 We first optimized the fragmentation and library preparation steps on high  
358 concentration HSV-2 culture specimens, comparing Nextera XT, Kapa HyperPlus, and  
359 custom NEB Fragmentase-based protocols. Kapa HyperPlus and NEB Fragmentase  
360 gave equivalent coefficients of variation for genome coverage (29.2% versus 31.0%),  
361 while Nextera XT coefficient of variation was three times higher (96.7%), likely due to the  
362 known GC bias of the enzyme (data not shown). We subsequently chose to perform  
363 pre-capture library preparation using half-volumes of Kapa HyperPlus with a 7-minute  
364 fragmentation step on 100ng of DNA, ligation of 15uM common Y-stub adapters, and  
365 0.8X Ampure post-ligation cleanup. Post-ligation PCR amplification was performed  
366 using the Kapa HiFi HotStart ReadyMix with Truseq dual-indexed primers (98C 45s,  
367 [98C 15s, 58C 30s, 72C 30s] x 12 cycles, and 72C 1 min) and cleaned using 0.8X  
368 Ampure beads. Pre-capture libraries are quantitated on a Qubit 3.0 Fluorometer  
369 (ThermoFisher).

370 Prior to capture, libraries were pooled in sets of 4-10 libraries based on the ratio  
371 of HSV-1/2 to beta-globin and total number of HSV-1/2 copies present in each library. A  
372 total of 300-500ng DNA is targeted for each pool. We aim for less than 10-fold variance  
373 from the highest to lowest concentration in HSV-1/2 copies within each pool.  
374 Hybridization capture is performed according to the IDT xGen protocol (version 2).  
375 Capture panels were designed as 1X tiling 120-bp panels according to HSV-1 strain 17  
376 and HSV-2 HG52 reference sequences (NC\_001806, NC\_001798) with human masking  
377 based on IDT xGen design. Oligonucleotide capture panel sequences are available in  
378 DataSet S1/S2.

379

### 380 *Computational pipeline for assembly and annotation of HSV genomes*

381 Our workflow combines multiple open source tools with custom shell and R  
382 scripts to rapidly extract and annotate near-full length HSV genomes from raw Illumina  
383 sequencing reads (Figure 2). All code is available on Github  
384 (<https://github.com/proychou/HSV>).

385 Raw sequencing reads (either paired or single-end) in fastq format are trimmed  
386 to remove adapters and low-quality regions using BBduk (34). QC reports are generated  
387 on the raw and preprocessed files using FastQC (35). Optionally, non-HSV reads are  
388 filtered out using BBduk with  $k = 31$  and  $hdist = 2$ . Preprocessed reads are *de novo*  
389 assembled using SPAdes and contigs are ordered by aligning to HSV-1 or -2 reference  
390 sequences (NC\_001806, NC\_001798, KF781518) using Mugsy (36, 37). A custom script  
391 in R/Bioconductor is used to fill in any gaps between contigs to create a template and  
392 reads are mapped to this template using Bowtie2 (38). A second script using  
393 R/Bioconductor is used to construct and clean up the final consensus sequence and  
394 prepare files for annotation. Annotation is performed using Prokka and a custom script to  
395 construct the final consensus sequence (39).



396           Although designed to be run on a high-performance computing (HPC) cluster, the  
397 code can also be run on a desktop computer. Additional wrapper scripts are available for  
398 parallelization of samples on an HPC cluster with scheduling systems like SLURM or  
399 PBS/Torque. Consensus sequences for each pair were aligned using MAFFT, pairwise  
400 differences calculated, UL-US extracted and locations of differences determined by  
401 adding annotations from HSV 1 references. The ggplot2 and nplr packages were used  
402 in R to calculate the limits of genome recovery (40). Phylogeny were created using  
403 MrBayes with default parameters (41).

404

#### 405 *Recombination analysis of HSV-1 culture*

406           HSV-1 isolate sequences were examined individually for HSV-2 recombination  
407 using alignment trios with Chimp HSV (NC\_023677.1) and an HSV-2 reference  
408 sequence (KF781518.1) as input for RDP (version Beta 4.95). The RDP program was  
409 run from the command line with the default settings (42). This program uses the RDP,  
410 GENECONV, Chimaera, and MaxChi algorithms to both detect events and verify events  
411 identified by other algorithms. The algorithms BootScan, SiScan, and 3Seq are  
412 computationally intensive when used to detect new events and so are only used to verify  
413 other events when using the default settings. All output files were combined and  
414 screened for p-value <  $1 \times 10^{-10}$  for at least three algorithms. Results were the same when  
415 all putative events having a p-value of  $1 \times 10^{-10}$  or smaller for only 2 algorithms were  
416 considered.

417

#### 418 *Culture of HSV-1 isolates*

419           Swab samples were collected and transported to the clinical lab in universal  
420 transport medium. Supernatant fluid was removed, diluted with Hanks Balanced Salt  
421 Solution (HBSS) with antibiotics, centrifuged at 700xg for 10 minutes, and 0.2 mL was

422 inoculated into duplicate Human Fibroblasts (MRHF) (Diagnostic Hybrids). Cell  
423 monolayers were observed microscopically daily for HSV cytopathic effect (CPE). If  
424 typical CPE noted, culture media was harvested and frozen at -80°C for PCR analysis.  
425 To confirm subtype of isolate, MRHF cells were scrapped and spotted onto welled  
426 slides, air-dried, fixed in acetone and stained with monoclonal antibody to HSV-1 and  
427 HSV-2 (MicroTrak, Trinity Biotech).

428

#### 429 **Acknowledgements**

430 AW has received funding for clinical trials from Genocea and Vical through the University  
431 and consulting fees from Aicuris.

432

433

434 **References**

435

- 436 1. Looker KJ, Magaret AS, May MT, Turner KME, Vickerman P, Gottlieb SL, Newman  
437 LM. 2015. Global and Regional Estimates of Prevalent and Incident Herpes Simplex  
438 Virus Type 1 Infections in 2012. *PloS One* 10:e0140765.
- 439 2. Looker KJ, Magaret AS, Turner KME, Vickerman P, Gottlieb SL, Newman LM. 2015.  
440 Global estimates of prevalent and incident herpes simplex virus type 2 infections in  
441 2012. *PloS One* 10:e114989.
- 442 3. Roberts CM, Pfister JR, Spear SJ. 2003. Increasing proportion of herpes simplex  
443 virus type 1 as a cause of genital herpes infection in college students. *Sex Transm*  
444 *Dis* 30:797–800.
- 445 4. Koelle DM, Norberg P, Fitzgibbon MP, Russell RM, Greninger AL, Huang M-L,  
446 Stensland L, Jing L, Magaret AS, Diem K, Selke S, Xie H, Celum C, Lingappa JR,  
447 Jerome KR, Wald A, Johnston C. 2017. Worldwide circulation of HSV-2 × HSV-1  
448 recombinant strains. *Sci Rep* 7:44084.
- 449 5. Burrell S, Boutolleau D, Ryu D, Agut H, Merkel K, Leendertz FH, Calvignac-Spencer  
450 S. 2017. Ancient recombination events between human herpes simplex viruses. *Mol*  
451 *Biol Evol*.
- 452 6. Szpara ML, Gatherer D, Ochoa A, Greenbaum B, Dolan A, Bowden RJ, Enquist LW,  
453 Legendre M, Davison AJ. 2014. Evolution and Diversity in Human Herpes Simplex  
454 Virus Genomes. *J Virol* 88:1209–1227.

- 455 7. Colgrove R, Diaz F, Newman R, Saif S, Shea T, Young S, Henn M, Knipe DM. 2014.  
456 Genomic sequences of a low passage herpes simplex virus 2 clinical isolate and its  
457 plaque-purified derivative strain. *Virology* 450–451:140–145.
- 458 8. Newman RM, Lamers SL, Weiner B, Ray SC, Colgrove RC, Diaz F, Jing L, Wang K,  
459 Saif S, Young S, Henn M, Laeyendecker O, Tobian AAR, Cohen JI, Koelle DM,  
460 Quinn TC, Knipe DM. 2015. Genome Sequencing and Analysis of Geographically  
461 Diverse Clinical Isolates of Herpes Simplex Virus 2. *J Virol* 89:8219–8232.
- 462 9. Johnston C, Magaret A, Roychoudhury P, Greninger AL, Cheng A, Diem K,  
463 Fitzgibbon MP, Huang M-L, Selke S, Lingappa JR, Celum C, Jerome KR, Wald A,  
464 Koelle DM. 2017. Highly conserved intragenic HSV-2 sequences: Results from next-  
465 generation sequencing of HSV-2 UL and US regions from genital swabs collected  
466 from 3 continents. *Virology* 510:90–98.
- 467 10. Johnston C, Magaret A, Roychoudhury P, Greninger AL, Reeves D, Schiffer J,  
468 Jerome KR, Sather C, Diem K, Lingappa JR, Celum C, Koelle DM, Wald A. 2017.  
469 Dual-strain genital herpes simplex virus type 2 (HSV-2) infection in the US, Peru,  
470 and 8 countries in sub-Saharan Africa: A nested cross-sectional viral genotyping  
471 study. *PLoS Med* 14:e1002475.
- 472 11. Lee HK, Tang JW-T, Kong DH-L, Loh TP, Chiang DK-L, Lam TT-Y, Koay ES-C.  
473 2013. Comparison of mutation patterns in full-genome A/H3N2 influenza sequences  
474 obtained directly from clinical samples and the same samples after a single MDCK  
475 passage. *PLoS One* 8:e79252.
- 476 12. Hooper KA, Bloom JD. 2013. A mutant influenza virus that uses an N1  
477 neuraminidase as the receptor-binding protein. *J Virol* 87:12531–12540.

- 478 13. Xue KS, Hooper KA, Ollodart AR, Dingens AS, Bloom JD. 2016. Cooperation  
479 between distinct viral variants promotes growth of H3N2 influenza in cell culture.  
480 eLife 5:e13974.
- 481 14. Bateman AC, Greninger AL, Atienza EE, Limaye AP, Jerome KR, Cook L. 2017.  
482 Quantification of BK Virus Standards by Quantitative Real-Time PCR and Droplet  
483 Digital PCR Is Confounded by Multiple Virus Populations in the WHO BKV  
484 International Standard. Clin Chem 63:761–769.
- 485 15. Greninger AL, Bateman AC, Atienza EE, Wendt S, Makhsous N, Jerome KR, Cook  
486 L. 2017. Copy Number Heterogeneity of JC Virus Standards. J Clin Microbiol  
487 55:824–831.
- 488 16. Stamey FR, Dominguez G, Black JB, Dambaugh TR, Pellett PE. 1995. Intragenomic  
489 linear amplification of human herpesvirus 6B oriLyt suggests acquisition of oriLyt by  
490 transposition. J Virol 69:589–596.
- 491 17. Greninger AL, Roychoudhury P, Makhsous N, Hanson D, Chase J, Krueger G, Xie  
492 H, Huang M-L, Saunders L, Ablashi D, Koelle DM, Cook L, Jerome KR. 2018. Copy  
493 number heterogeneity, large origin tandem repeats, and interspecies recombination  
494 in HHV-6A and HHV-6B reference strains. J Virol.
- 495 18. Greninger AL, Knudsen GM, Roychoudhury P, Hanson DJ, Sedlak RH, Xie H, Guan  
496 J, Nguyen T, Peddu V, Boeckh M, Huang M-L, Cook L, Depledge DP, Zerr DM,  
497 Koelle DM, Gantt S, Yoshikawa T, Caserta M, Hill JA, Jerome KR. 2018.  
498 Comparative genomic, transcriptomic, and proteomic reannotation of human  
499 herpesvirus 6. BMC Genomics 19:204.

- 500 19. Cha TA, Tom E, Kemble GW, Duke GM, Mocarski ES, Spaete RR. 1996. Human  
501 cytomegalovirus clinical isolates carry at least 19 genes not found in laboratory  
502 strains. *J Virol* 70:78–83.
- 503 20. Dargan DJ, Douglas E, Cunningham C, Jamieson F, Stanton RJ, Baluchova K,  
504 McSharry BP, Tomasec P, Emery VC, Percivalle E, Sarasini A, Gerna G, Wilkinson  
505 GWG, Davison AJ. 2010. Sequential mutations associated with adaptation of human  
506 cytomegalovirus to growth in cell culture. *J Gen Virol* 91:1535–1546.
- 507 21. Skare J, Edson C, Farley J, Strominger JL. 1982. The B95-8 isolate of Epstein-Barr  
508 virus arose from an isolate with a standard genome. *J Virol* 44:1088–1091.
- 509 22. Cohrs RJ, Lee KS, Beach A, Sanford B, Baird NL, Como C, Graybill C, Jones D,  
510 Tekeste E, Ballard M, Chen X, Yalacki D, Fietze S, Jones K, Lenac Rovis T, Jonjić  
511 S, Haas J, Gilden D. 2017. Targeted Genome Sequencing Reveals Varicella-Zoster  
512 Virus Open Reading Frame 12 Deletion. *J Virol* 91.
- 513 23. Depledge DP, Palser AL, Watson SJ, Lai IY-C, Gray ER, Grant P, Kanda RK,  
514 Leproust E, Kellam P, Breuer J. 2011. Specific Capture and Whole-Genome  
515 Sequencing of Viruses from Clinical Samples. *PLOS ONE* 6:e27805.
- 516 24. Depledge DP, Brown J, Macanovic J, Underhill G, Breuer J. 2016. Viral Genome  
517 Sequencing Proves Nosocomial Transmission of Fatal Varicella. *J Infect Dis*  
518 214:1399–1402.
- 519 25. Depledge DP, Ouwendijk WJD, Sadaoka T, Braspenning SE, Mori Y, Cohrs RJ,  
520 Verjans GMGM, Breuer J. 2018. A spliced latency-associated VZV transcript maps  
521 antisense to the viral transactivator gene 61. *Nat Commun* 9:1167.

- 522 26. Tronstein E, Johnston C, Huang M-L, Selke S, Magaret A, Warren T, Corey L, Wald  
523 A. 2011. Genital shedding of herpes simplex virus among symptomatic and  
524 asymptomatic persons with HSV-2 infection. *JAMA* 305:1441–1449.
- 525 27. Hwang CB, Ruffner KL, Coen DM. 1992. A point mutation within a distinct conserved  
526 region of the herpes simplex virus DNA polymerase gene confers drug resistance. *J*  
527 *Virology* 66:1774–1776.
- 528 28. Safrin S, Kemmerly S, Plotkin B, Smith T, Weissbach N, De Veranez D, Phan LD,  
529 Cohn D. 1994. Foscarnet-Resistant Herpes Simplex Virus Infection in Patients with  
530 AIDS. *J Infect Dis* 169:193–196.
- 531 29. Piret J, Boivin G. 2011. Resistance of Herpes Simplex Viruses to Nucleoside  
532 Analogues: Mechanisms, Prevalence, and Management. *Antimicrob Agents*  
533 *Chemother* 55:459–472.
- 534 30. Briese T, Kapoor A, Mishra N, Jain K, Kumar A, Jabado OJ, Lipkin WI. 2015. Virome  
535 Capture Sequencing Enables Sensitive Viral Diagnosis and Comprehensive Virome  
536 Analysis. *mBio* 6.
- 537 31. Wylie TN, Wylie KM, Herter BN, Storch GA. 2015. Enhanced virome sequencing  
538 through solution-based capture enrichment. *Genome Res*.
- 539 32. Chen Y, Scieux C, Garrat V, Socié G, Rocha V, Molina J-M, Thouvenot D, Morfin F,  
540 Hocqueloux L, Garderet L, Espérou H, Séliami F, Devergie A, Leleu G, Aymard M,  
541 Morinet F, Gluckman E, Ribaud P. 2000. Resistant Herpes Simplex Virus Type 1  
542 Infection: An Emerging Concern after Allogeneic Stem Cell Transplantation. *Clin*  
543 *Infect Dis* 31:927–935.

- 544 33. Jerome KR, Huang M-L, Wald A, Selke S, Corey L. 2002. Quantitative stability of  
545 DNA after extended storage of clinical specimens as determined by real-time PCR. J  
546 Clin Microbiol 40:2609–2611.
- 547 34. BBTools. DOE Jt Genome Inst.
- 548 35. Andrews S. FASTQC. Babraham Bioinformatics.
- 549 36. Bankevich A, Nurk S, Antipov D, Gurevich AA, Dvorkin M, Kulikov AS, Lesin VM,  
550 Nikolenko SI, Pham S, Prjibelski AD, Pyshkin AV, Sirotkin AV, Vyahhi N, Tesler G,  
551 Alekseyev MA, Pevzner PA. 2012. SPAdes: A New Genome Assembly Algorithm  
552 and Its Applications to Single-Cell Sequencing. J Comput Biol 19:455–477.
- 553 37. Angiuoli SV, Salzberg SL. 2011. Mugsy: fast multiple alignment of closely related  
554 whole genomes. Bioinforma Oxf Engl 27:334–342.
- 555 38. Langmead B, Salzberg SL. 2012. Fast gapped-read alignment with Bowtie 2. Nat  
556 Methods 9:357–359.
- 557 39. Seemann T. 2014. Prokka: rapid prokaryotic genome annotation. Bioinforma Oxf  
558 Engl 30:2068–2069.
- 559 40. Wickham H. 2009. Ggplot2: Elegant Graphics for Data Analysis, 2nd ed. Springer  
560 Publishing Company, Incorporated.
- 561 41. Ronquist F, Teslenko M, van der Mark P, Ayres DL, Darling A, Höhna S, Larget B,  
562 Liu L, Suchard MA, Huelsenbeck JP. 2012. MrBayes 3.2: efficient Bayesian  
563 phylogenetic inference and model choice across a large model space. Syst Biol  
564 61:539–542.



565 42. Martin DP, Murrell B, Golden M, Khoosal A, Muhire B. 2015. RDP4: Detection and  
566 analysis of recombination patterns in virus genomes. *Virus Evol* 1.

567

568

569

570 **Figure Legends**

571 **Figure 1** – Experimental protocol. A) DNA is extracted from either clinical swabs in  
572 proteinase K buffer or cell culture supernatant. DNA is quantitated for HSV and beta-  
573 globin and it is enzymatically fragmented, end-repaired, dA-tailed, and TruSeq Y-  
574 adapters are ligated on. B) Design of 1X 120-bp tiling panel across HSV-1 and HSV-2  
575 genomes. C) Samples are pooled in sets of 4-10 based on the HSV/beta-globin ratio to  
576 minimize variance in viral concentration and readjusted based on the total HSV copies  
577 present in each sample. D) A typical high concentration HSV-2 sample is shown ( $10^6$   
578 copies/mL virus) based on shotgun sequencing and capture sequencing, illustrating a  
579 >3000-fold increase in viral sequence enrichment.

580

581 **Figure 2** – Overview of pipeline for assembly and annotation of HSV sequences. Raw  
582 reads are adapter and quality trimmed using BBDuk. If pre-capture shotgun HSV  
583 libraries are sequenced, trimmed reads are subjected to k-mer filtering prior to assembly  
584 to prevent tedious assembly of the human genome. Reads are de novo assembled  
585 using SPAdes v3.11 and mapped to each of three reference genomes to determine  
586 whether HSV-1 or HSV-2 was sequenced. Contigs are mapped to the chosen reference  
587 and gaps are filled with reference sequence. Finally, reads are mapped to this  
588 sequence in order to determine the consensus sequence before annotation and  
589 submission to NCBI.

590

591 **Figure 3** – Capture sequencing allows near complete genomes from all symptomatic  
592 HSV clinical samples. Efficiency of sequence enrichment from clinical samples for A)  
593 HSV-1 and B) HSV-2 is depicted. Precapture HSV percentage of total DNA is shown on  
594 the X-axis based on qPCR values for HSV and beta-globin. Postcapture HSV  
595 percentage is shown on the Y-axis based on percent of total reads mapping to HSV (on-

596 target percentage). Sample types are labeled by color for genital lesion (red), oral lesion  
597 (blue), asymptomatic oral shedding (green), or asymptomatic genital shedding (light  
598 green). The gold dotted line denotes 2% post-capture HSV reads, above which near  
599 complete genomes were obtained.

600

601 **Figure 4** – Limited evolution of HSV-1 during isolation in culture compared to sequence  
602 obtained directly from clinical samples. Phylogenetic analysis of UL (A) and US (B)  
603 sequences from HSV-1 subjected to capture sequencing after isolation in culture or  
604 directly from clinical sample. Across 14 of the paired samples, no single nucleotide  
605 variant was found in the UL or US region that was not present in homopolymers or  
606 UL36, US5, or US12 repeat regions. Of note, samples H4 and I5 were from the same  
607 patient 18 days apart illustrating HSV-1 oral superinfection. The long tree branch on I5  
608 consensus sequence is due to changes in allele frequencies due to competitive viral  
609 growth in vitro between the superinfecting strains. All branch poster probabilities are  
610 >99% unless otherwise noted.

611

612 **Figure 5** – Allele frequency changes for the I5/"day 18" original oral swab HSV-1  
613 genome and associated culture HSV-1 genome. The original consensus genome for the  
614 day 1 swab was used as a common reference from which to calculate allele frequency  
615 changes. The majority of alleles increase in frequency, crossing the 50% frequency  
616 threshold, resulting in artefactual evolution in culture that is the result of competition  
617 between mixed strains in culture.

618

619 **Supplemental material**

620

621 **Figure S1** – HSV-1 culture isolate captured with HSV-2 capture panel. Early in  
622 development, we attempted capture of an HSV-1 culture isolate with an HSV-2 capture  
623 panel. A) Coverage map of reads across the HSV-1 genome shows coverage was poor.  
624 Despite an average coverage of 179X, only 58% of the HSV-1 UL region had depth  $\geq$   
625 10X. Y-axis denotes read depth, while X-axis is the genome position for HSV-1. HSV-1  
626 genes are denoted in green while repeat regions are highlighted in light blue. B) HSV-1  
627 UL locus depth correlates with pairwise identity to HSV-2 UL sequence. We calculated  
628 the pairwise HSV-1 versus HSV-2 sequence identity across a 120 nucleotide sliding  
629 window and plotted as a histogram (blue). For each 120 nucleotide bin across the HSV-  
630 1 UL we calculated the median bin depth from the capture sequencing normalized to the  
631 maximum bin depth (black dots).

632

633 **Figure S2** – HSV-1 (A) and HSV-2 UL23 (B) genes show 100% identity whether  
634 sequenced by PCR-Sanger or capture panel next-generation sequencing approach.

635

636 Table S1A. HSV-1 capture efficiency

637 Table S1B. HSV-2 capture efficiency

638 Table S2A. HSV-1 swab and culture sequencing metadata

639 Table S2B - History HSV1+ clinical samples in culture. Cytopathic effect was checked  
640 every day and graded on a scale of 0-4 before harvest. H=Harvest

641 Table S3A – PCR primers for U23

642 Table S3B – Primers for PCR and confirmatory Sanger sequencing of discrepant original  
643 swab versus culture samples

644 Table S3C – Sequencing primers for U23

645 DataSet S1. Capture panel design for HSV-1

646 DataSet S2. Capture panel design for HSV-2

647

648

A

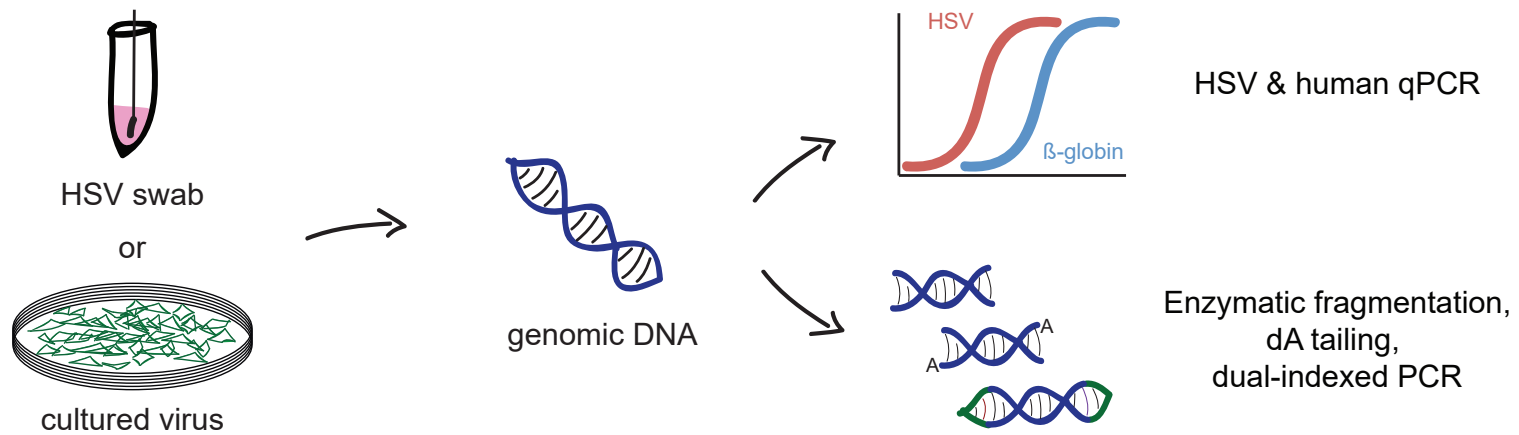

B

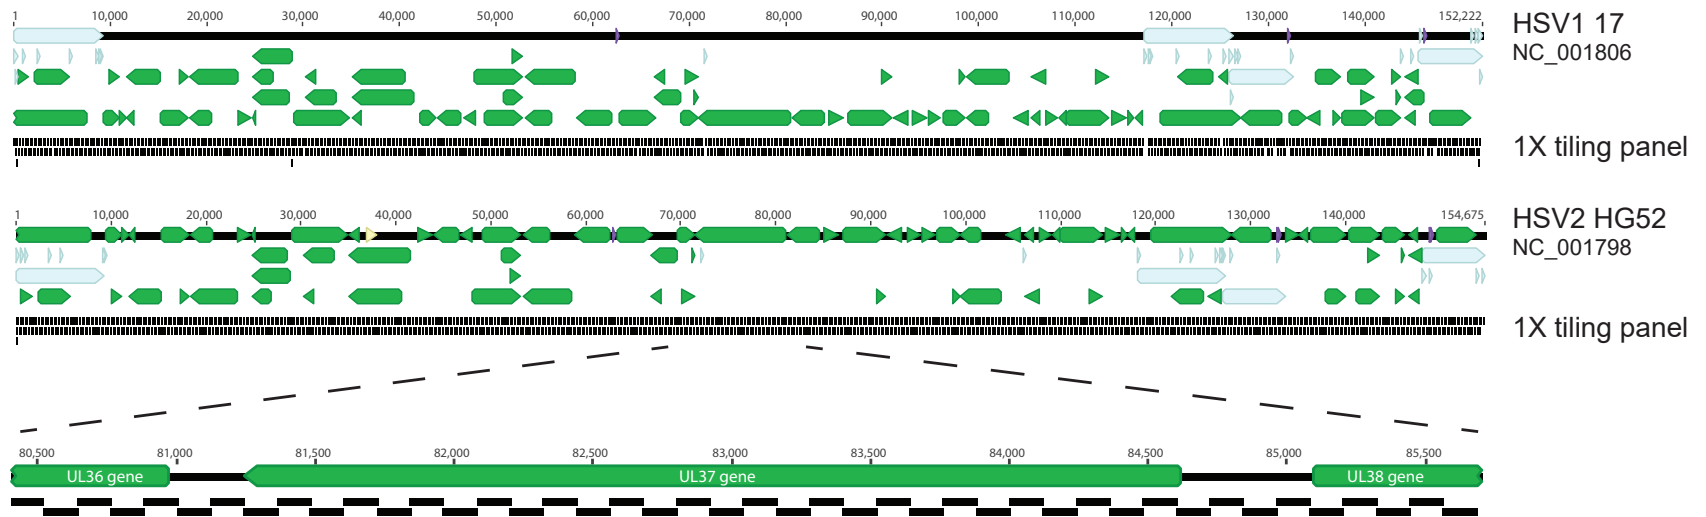

C

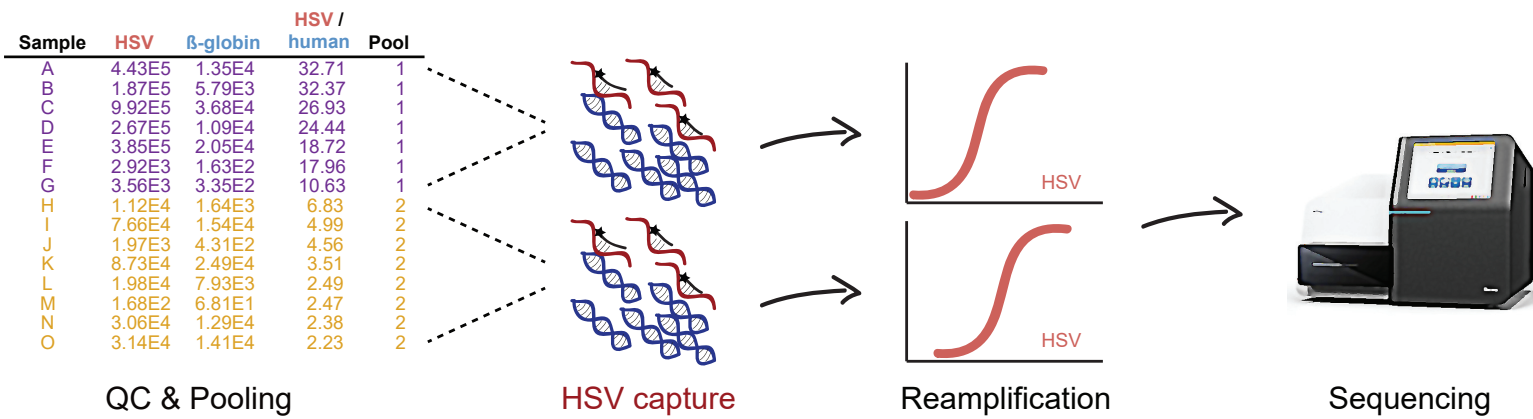

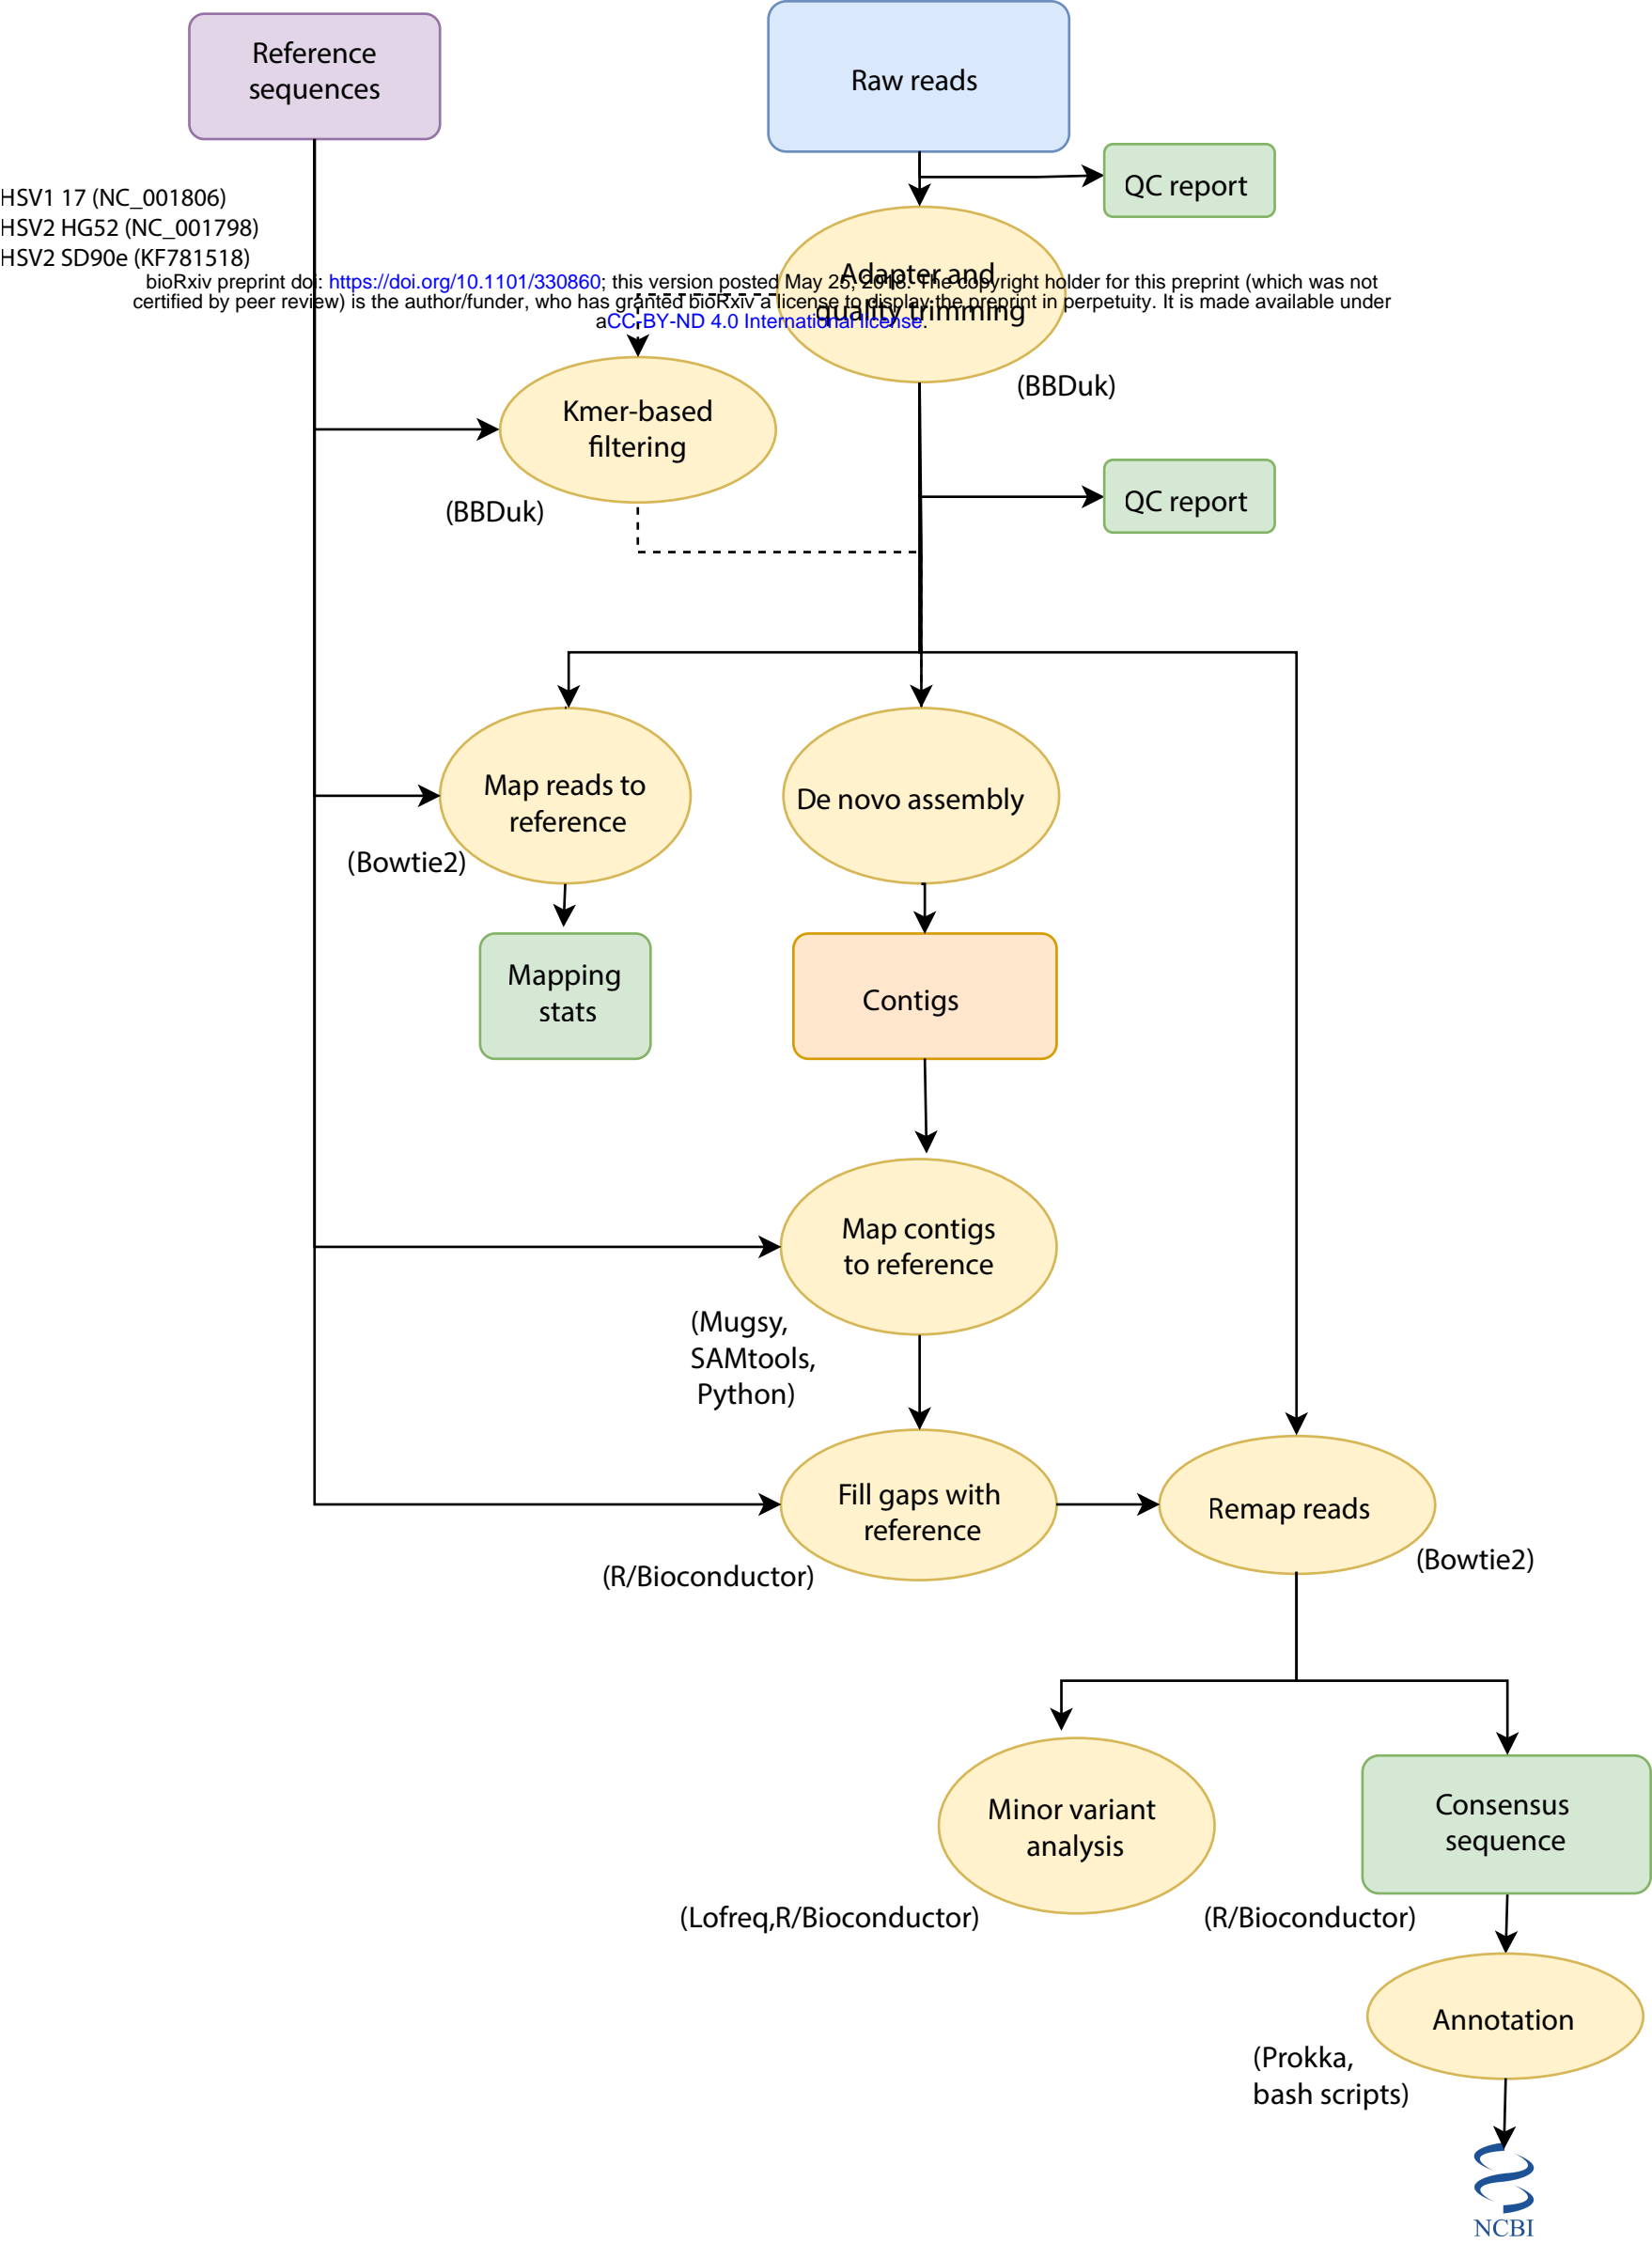

A

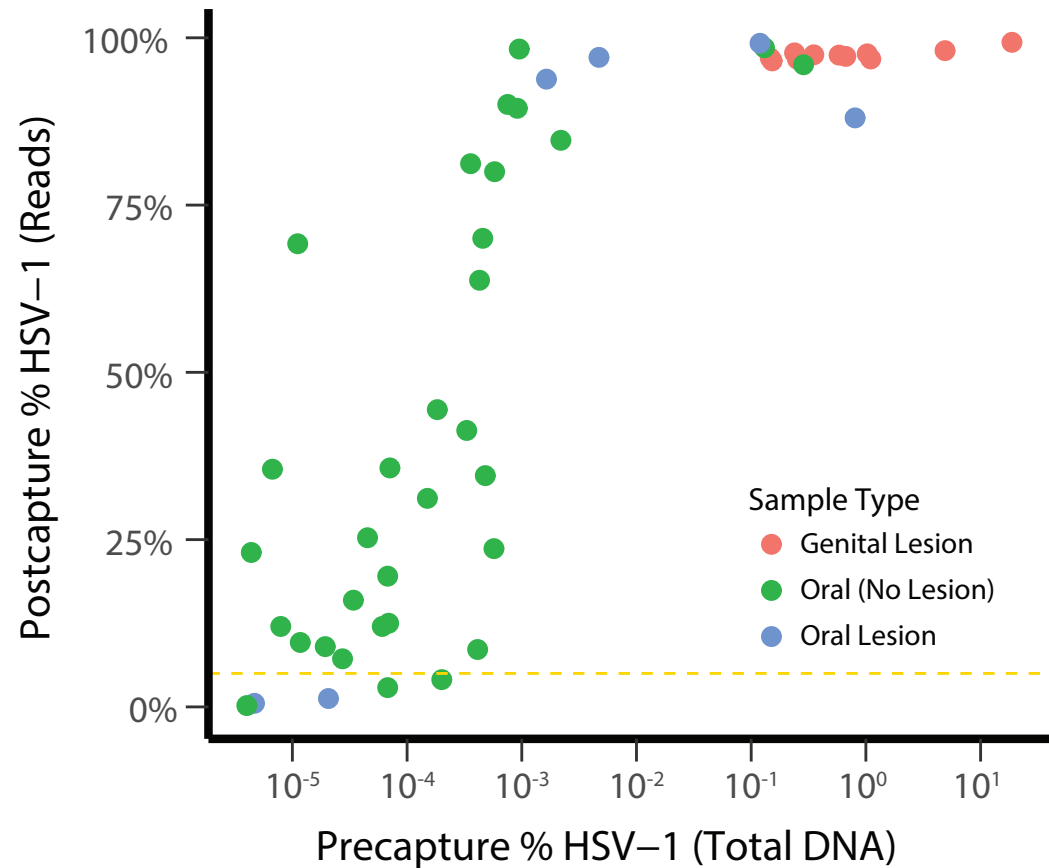

B

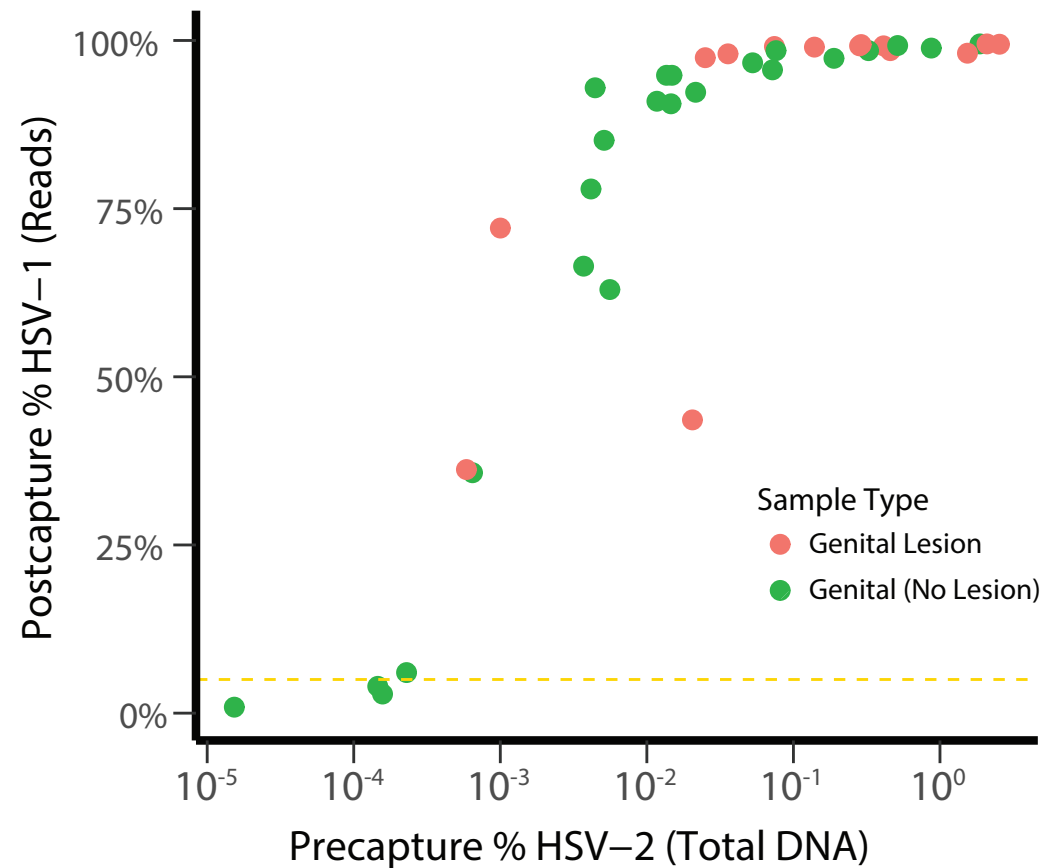



A

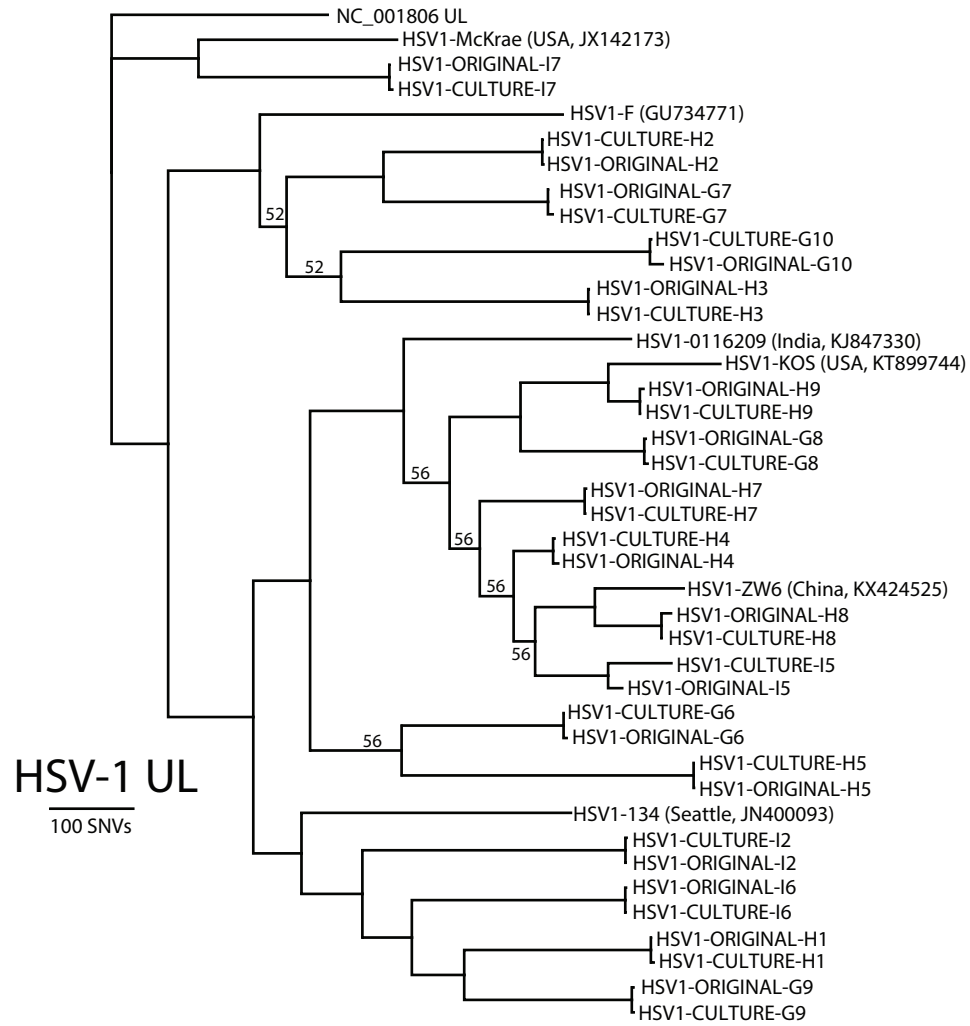

B

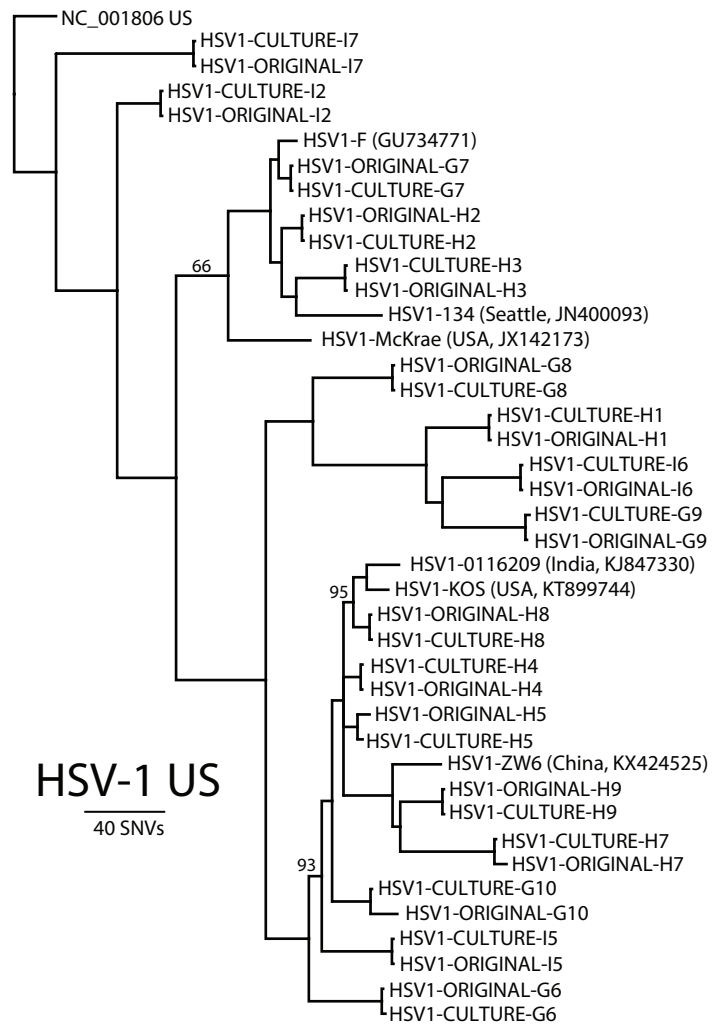

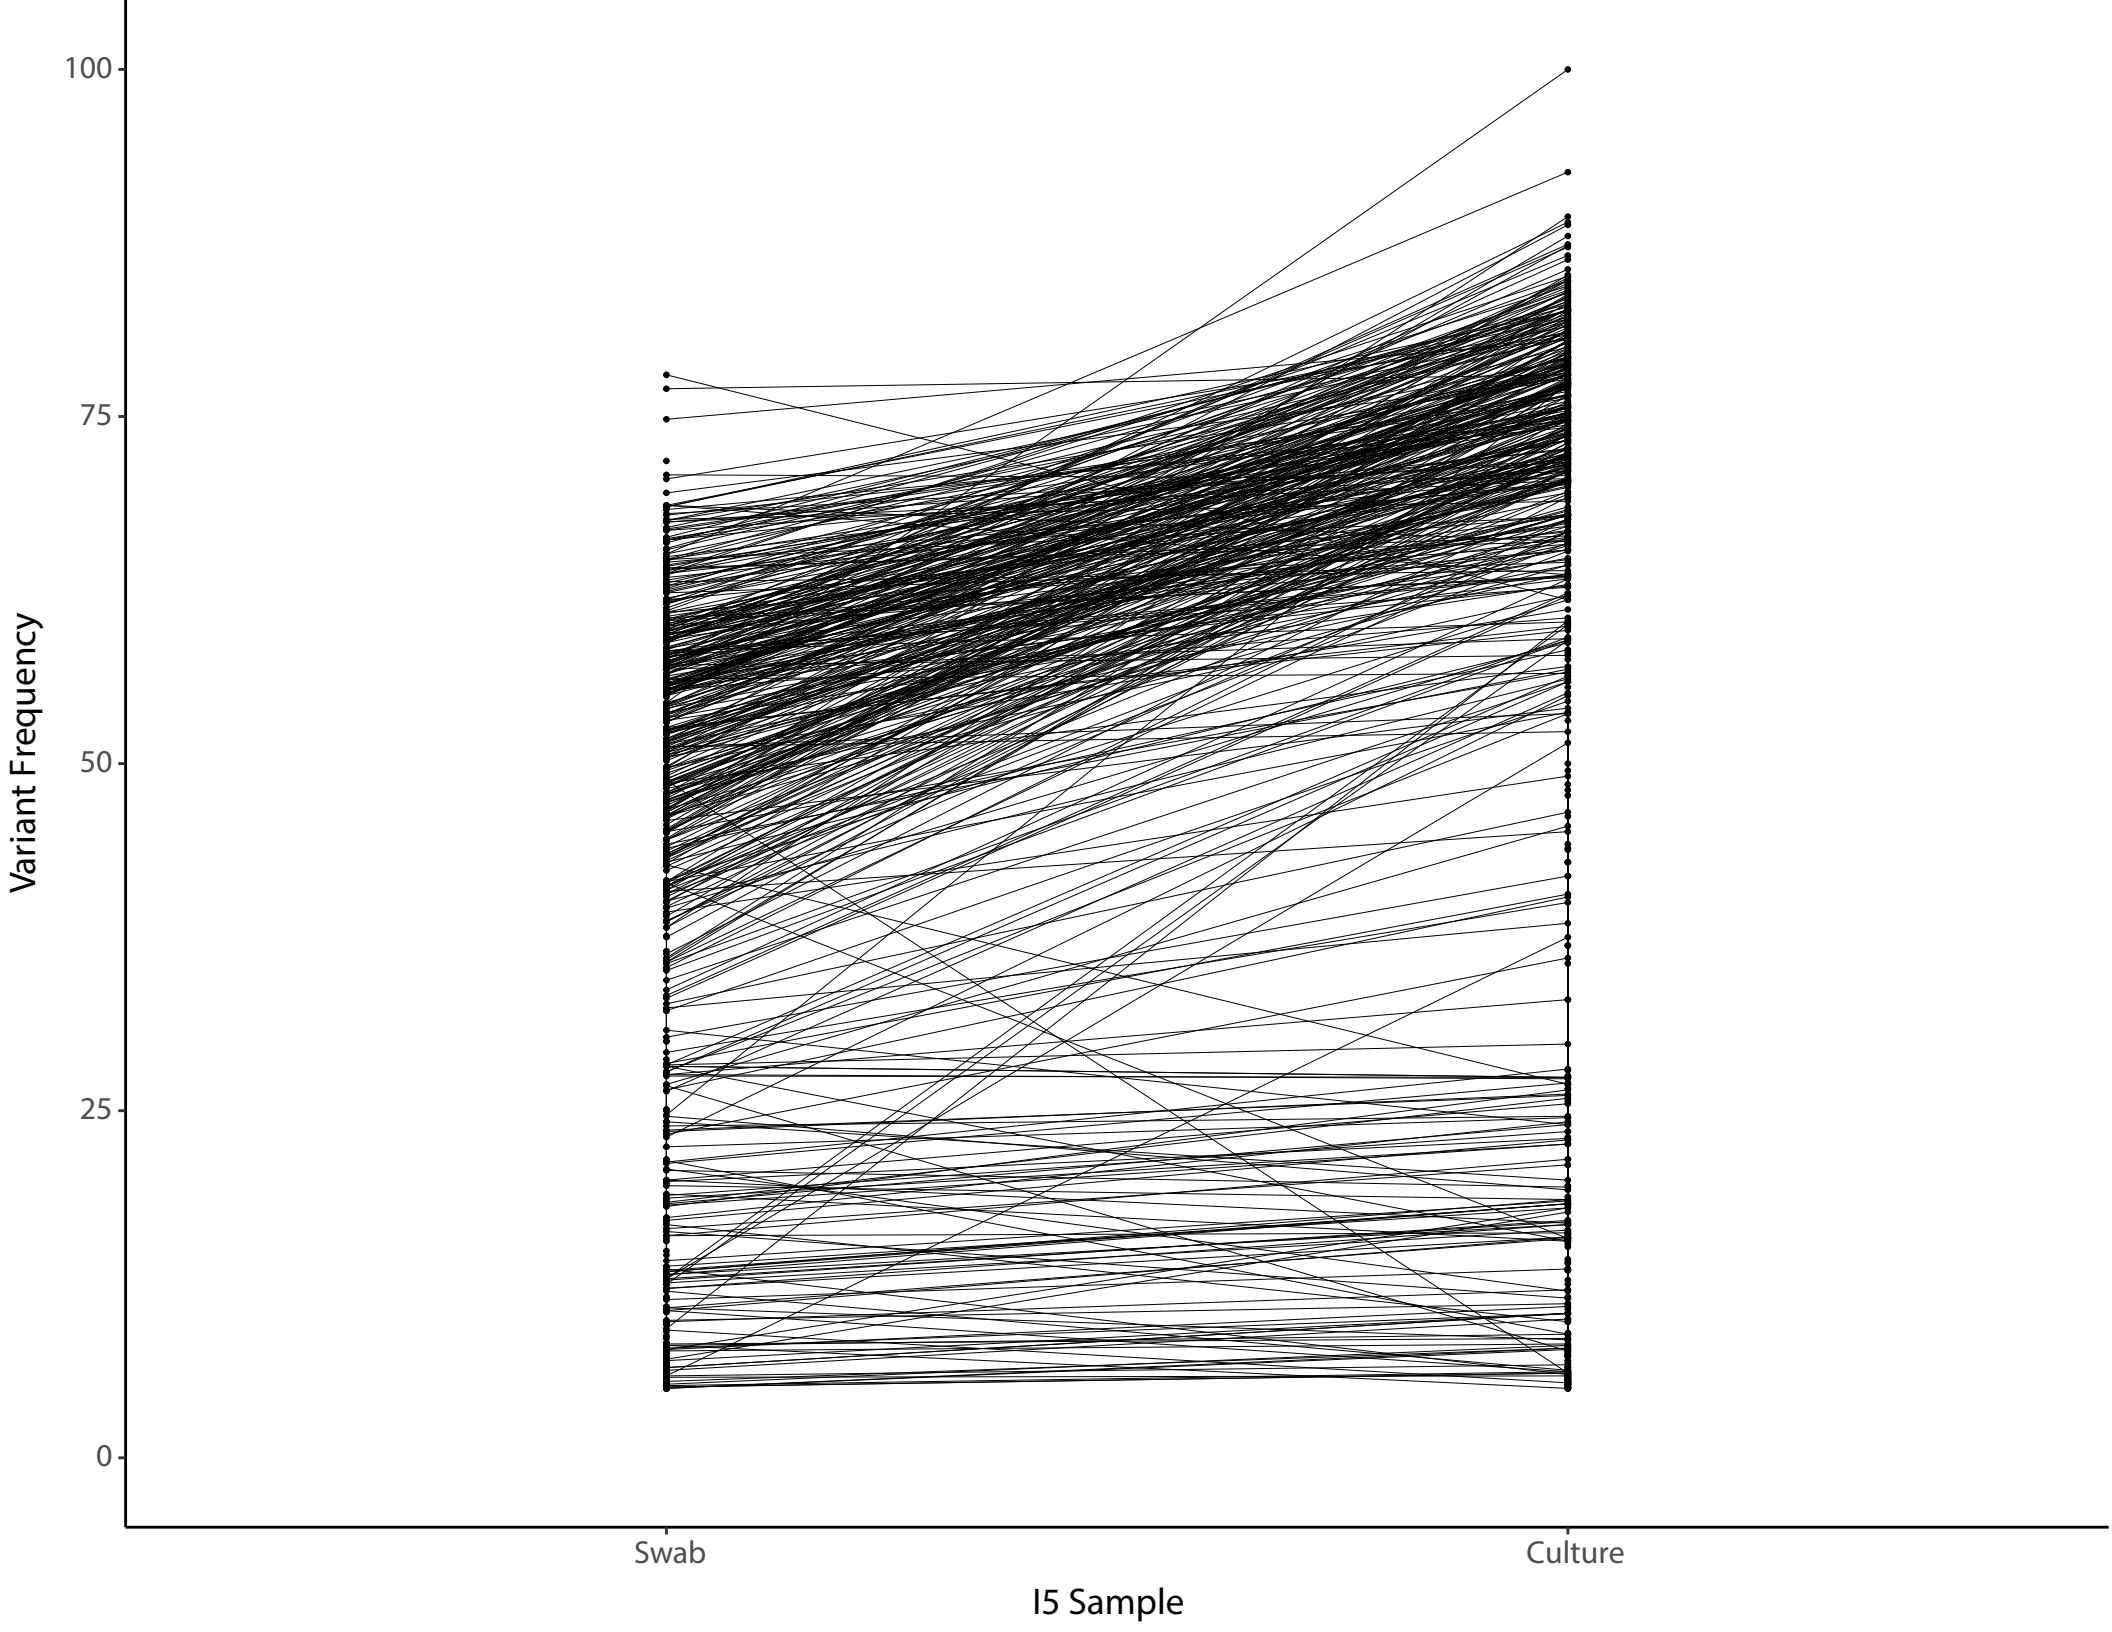

Source: http://biorxiv.org/content/10.1101/330860v1.full.pdf
